# Supplementary material
Source: Springer Nature journal article supplement (https://www.springermedizin.de/resource/supplementary/12948_2005_21_MOESM3_ESM.pdf/9557038)

*Ungated*

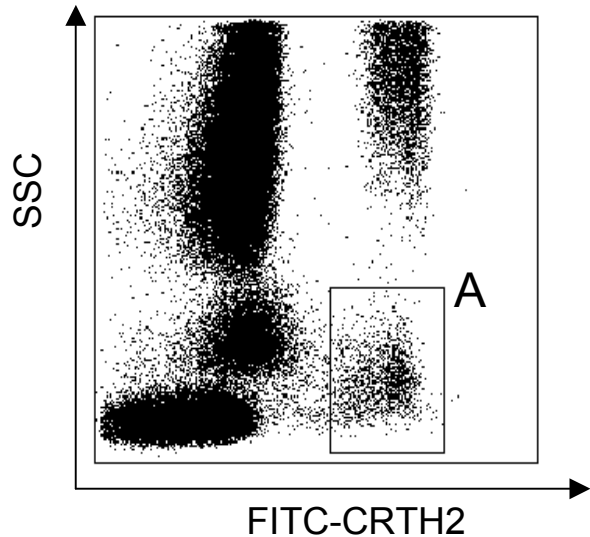

*Gated on A*

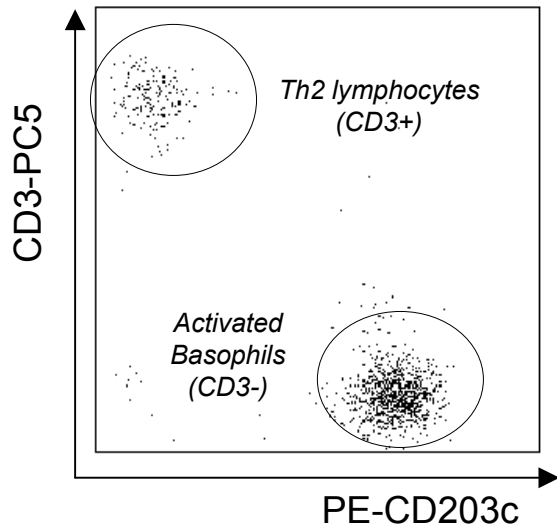

Supplement: MOESM3 [file 9557038]
